# Supplementary material for: Epigenetic activation during T helper 17 cell differentiation is mediated by Tripartite motif containing 28
Source: PubMed Central journal article supplement (PMC5897371; doi:10.1038/s41467-018-03852-2), 2018-04-12
Supplement: 41467_2018_3852_MOESM1_ESM.pdf [file 41467_2018_3852_MOESM1_ESM.pdf]

**Epigenetic activation during T helper 17 cell differentiation is mediated by Tripartite motif containing 28**

Jiang et al.

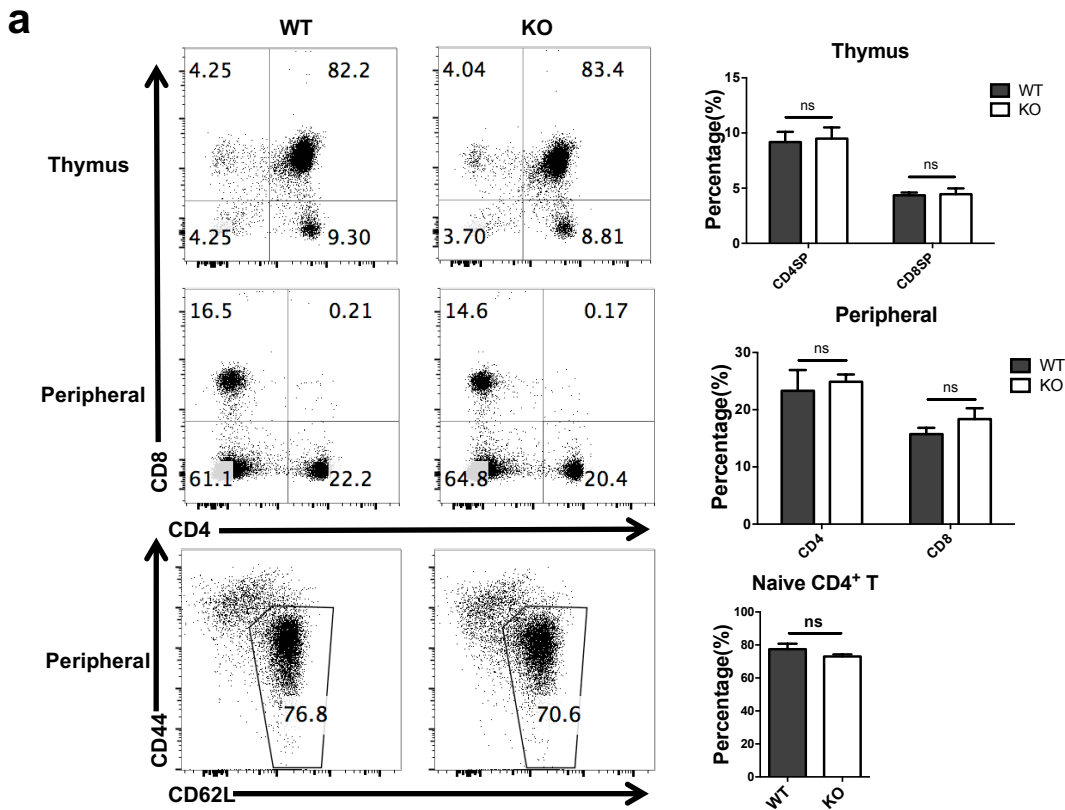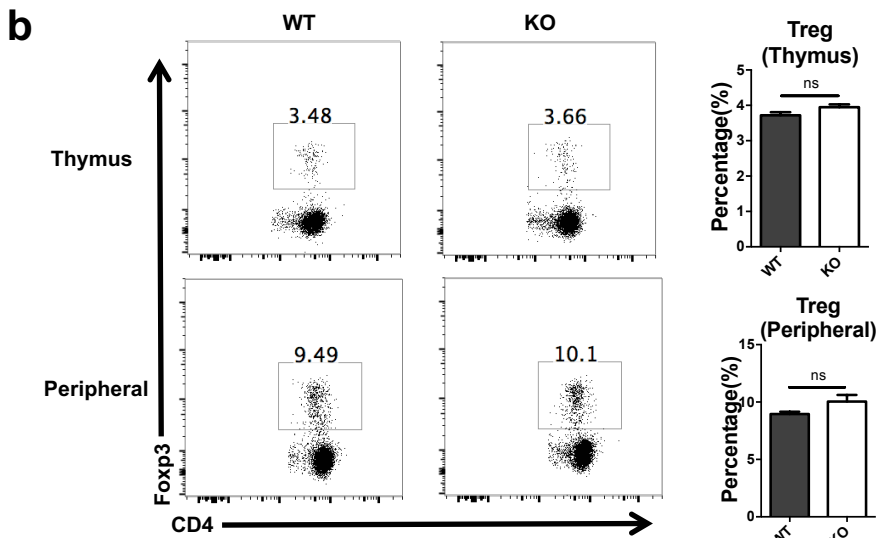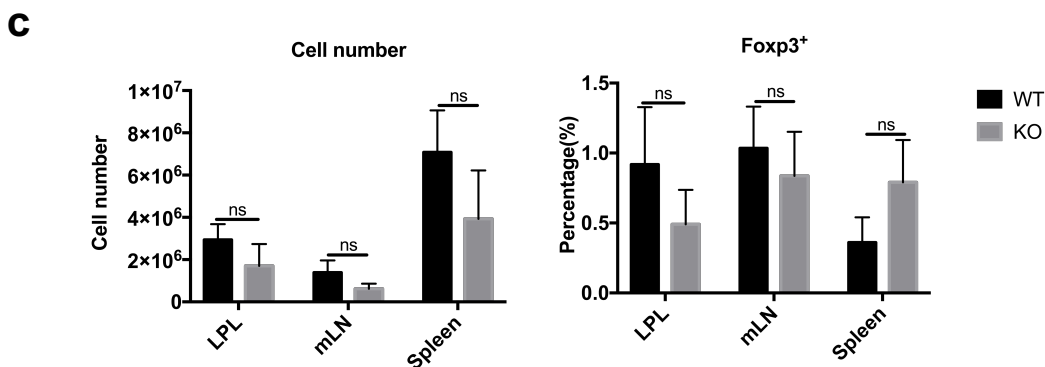

**Supplementary figure 1. T cell homeostasis in *Trim28*<sup>-/-</sup> mice.**

(a) Up: CD4<sup>+</sup> and CD8<sup>+</sup> T cells in the spleen, lymph nodes and thymus of WT (n=3) and *Trim28*<sup>-/-</sup> mice (n=3) (~6-7 weeks old); Down: naive CD4<sup>+</sup> T cells in the peripheral lymph nodes of WT (n=3) and *Trim28*<sup>-/-</sup> mice (n=3) (~21 weeks old mice); (b) nTreg cells in the thymus and peripheral in WT (n=3) and *Trim28*<sup>-/-</sup> mice (n=3) (~6-7 weeks old); (c) Statistic data of total infiltrated CD4<sup>+</sup> T cell numbers and Treg cells in the lamina propria (LPL) of large intestine, mesenteric lymph nodes (mLN) and spleen isolated from colitis mice (WT: n=6, KO: n=4). The data are a representative for 2-3 independent experiments. The statistical significance was determined by Student's t test (ns, not significant; p < 0.05, \*; p < 0.01, \*\*; p < 0.005, \*\*\*), and all error bars represent SDs.

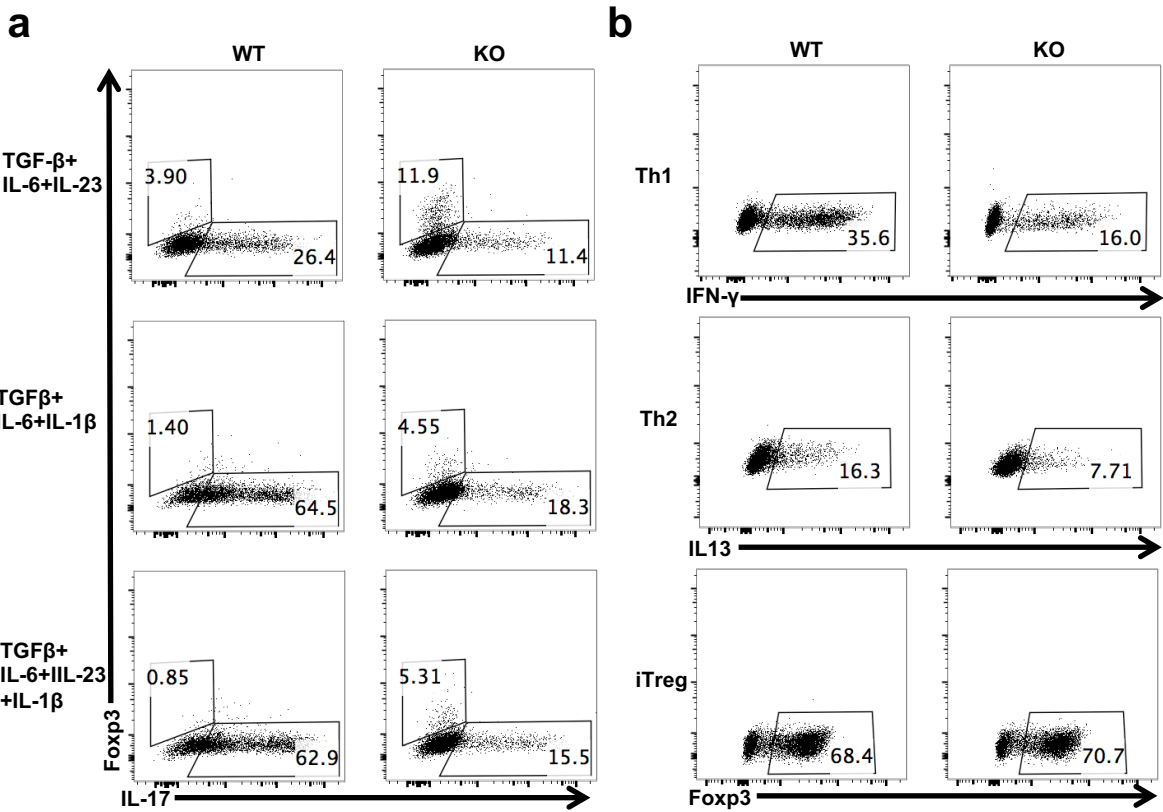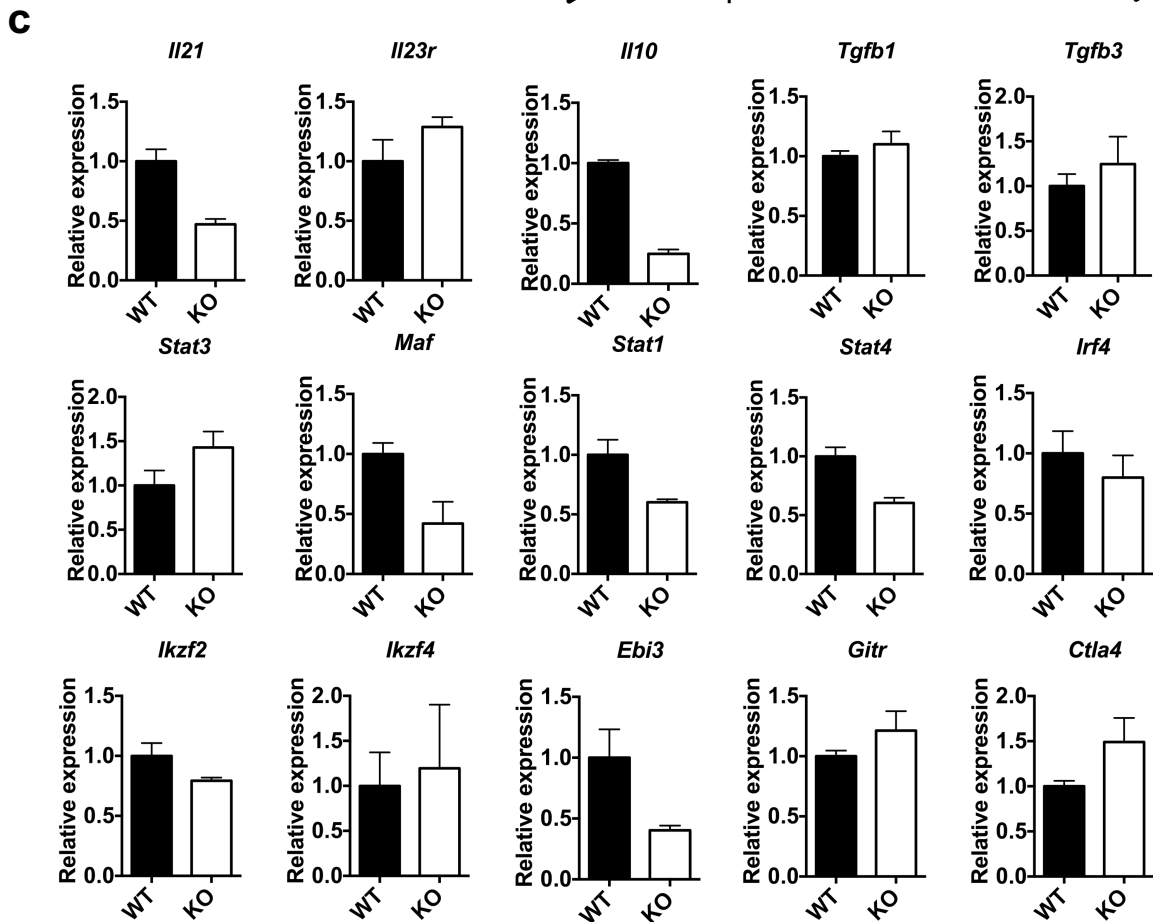

**Supplementary figure 2. TRIM28-deficient T cells were defective in Th17 and Th1 differentiation.** Naive CD4<sup>+</sup> T cells were sorted from WT and *Trim28*<sup>-/-</sup> mice and then polarized into (a) Th17 cells under indicated conditions for 3 days, then re-stimulated for intracellular staining or (c) mRNA analysis (TGF-β+IL-6), and (b) Th1, Th2 and iTreg cells for 4-6 days in *in vitro* cultures, and analyzed by intracellular staining after re-stimulation. These experiments were repeated for 3 times with the consistent results. All error bars represent SDs.

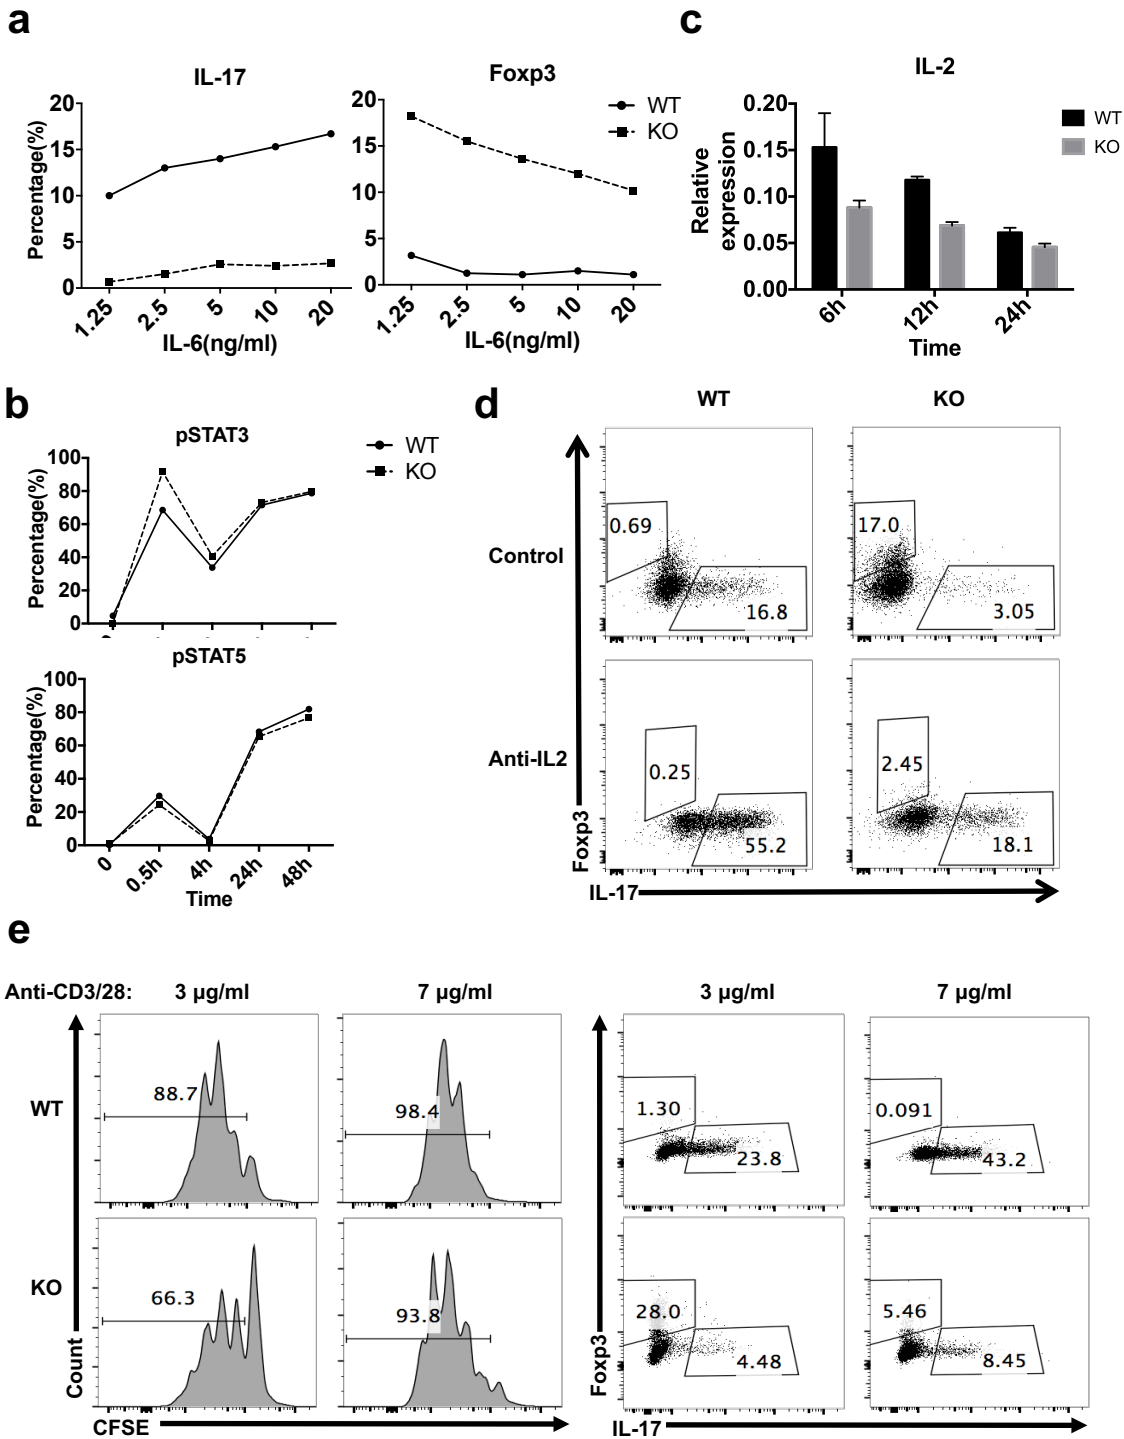

**Supplementary figure 3. TRIM28 intrinsically regulates Th17 cell development.**

(a-d) WT and *Trim28*<sup>-/-</sup> naive T cells were polarized into Th17 cells in the presence of TGF- $\beta$  and IL-6. (a) Expression of IL-17 and Foxp3 as determined by intracellular staining under different IL-6 concentrations; (b) Intracellular staining of phosphorylated STAT3 and STAT5 in Th17 cells polarized at different time points; y-axis: percentage of phosphorylated STATs proteins, x-axis: time after T cell activation; (c) IL-2 mRNA expression at different time points as determined by real-time PCR; (d) Th17 differentiation were performed with or without IL-2 blocking antibody; (e) CFSE-labeled WT or *Trim28*<sup>-/-</sup> naive CD4<sup>+</sup> T cells were cultured with indicated concentrations of anti-CD3&CD28 stimulation in the presence of TGF- $\beta$  and IL-6 for 3 days, and then harvested for CFSE detection (left) and intracellular staining (right). These experiments were repeated for twice with the consistent results. All error bars represent SDs.



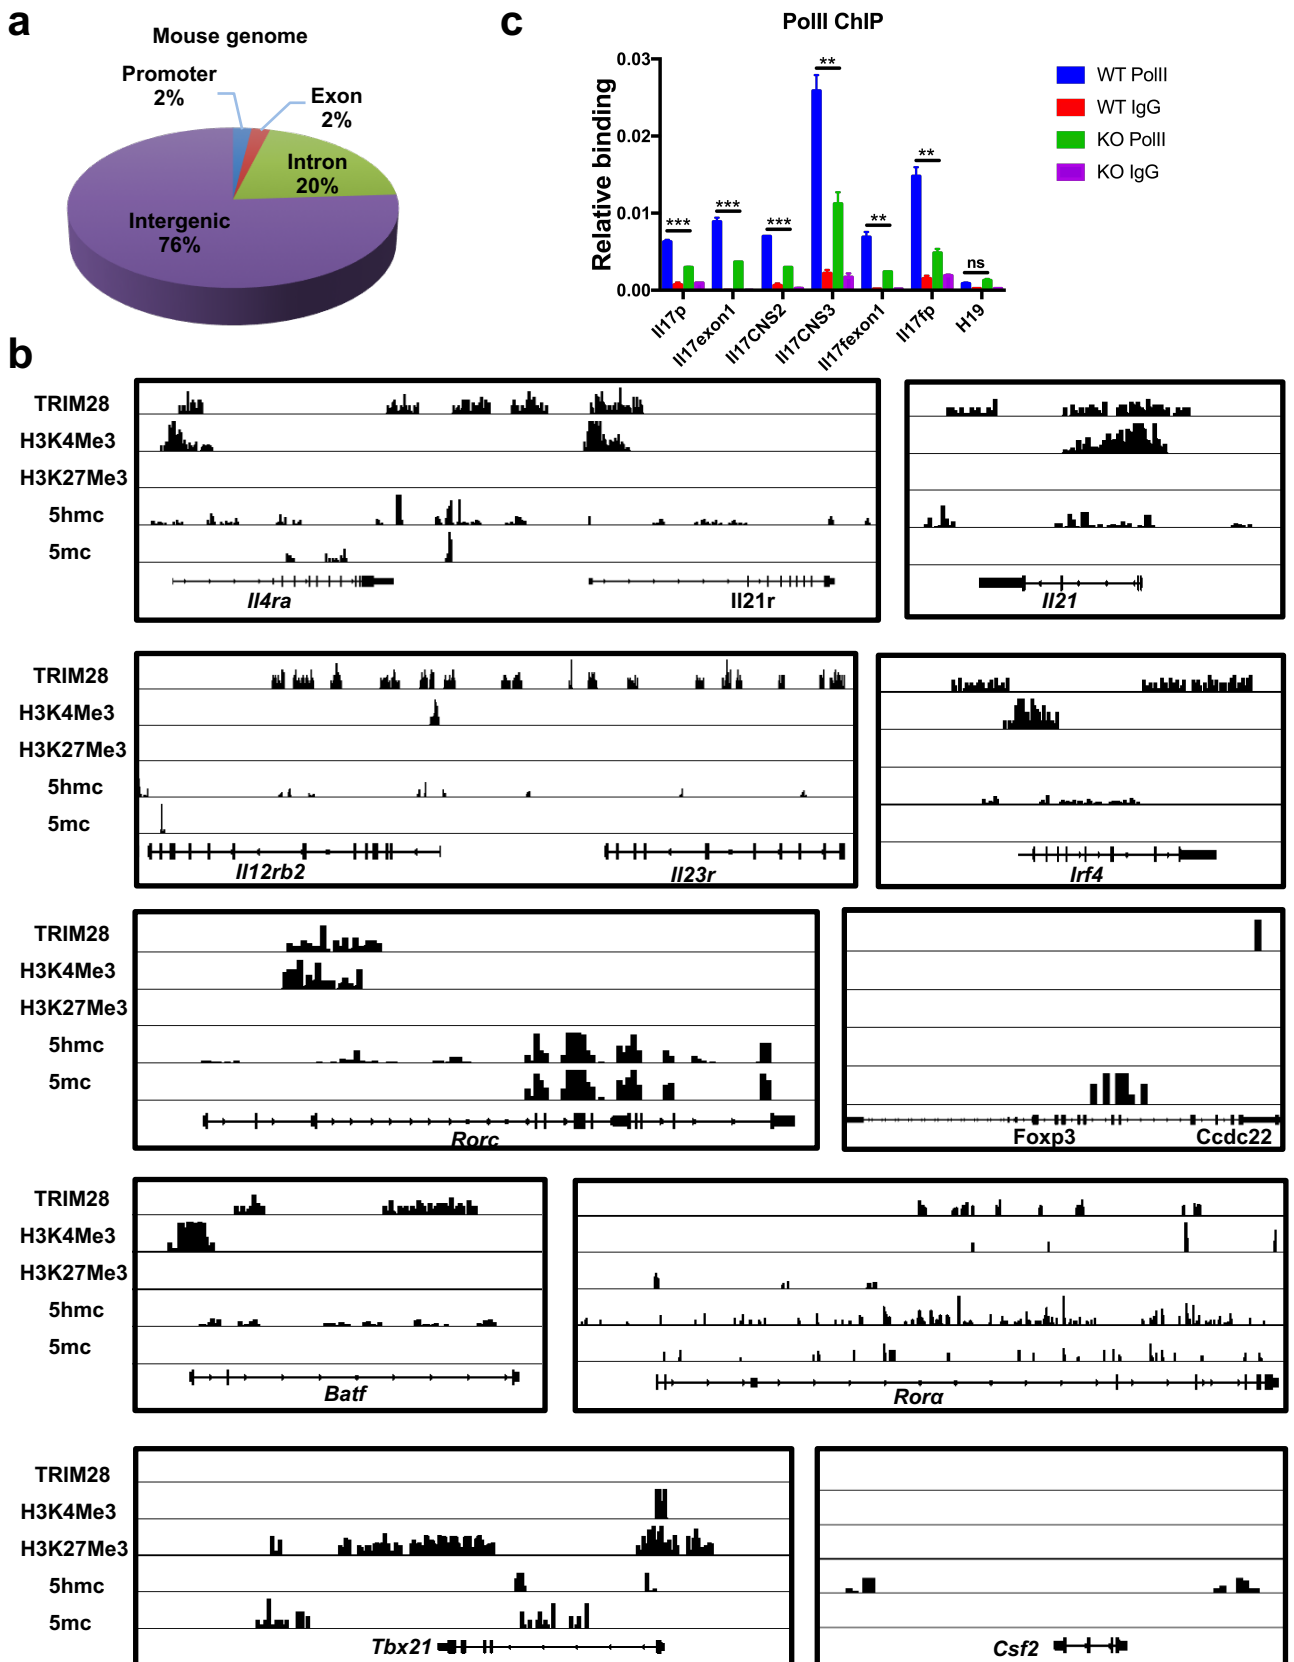

**Supplementary figure 4. TRIM28 positively regulated epigenetic activation in Th17 cells.**

(a) Distribution of genetic features across the whole mouse genome (mm10); (b) IGV browser view of histone markers (H3K4me3 & H3K27me3) and DNA markers (5hmc & 5mc) and TRIM28 binding peaks at the indicated gene loci in WT Th17 cells cultured *in vitro*; (c) WT or *Trim28*<sup>-/-</sup> naive CD4<sup>+</sup> T cells were cultured at Th17 condition (TGF- $\beta$  plus IL-6) for 3 days, and then harvested for ChIP-qPCR by anti-phospho-PolII antibody (Ser5). This experiment was repeated twice with consistent results. The statistical significance was determined by Student's t test (ns, not significant;  $p < 0.05$ , \*;  $p < 0.01$ , \*\*;  $p < 0.005$ , \*\*\*), and all error bars represent SDs.

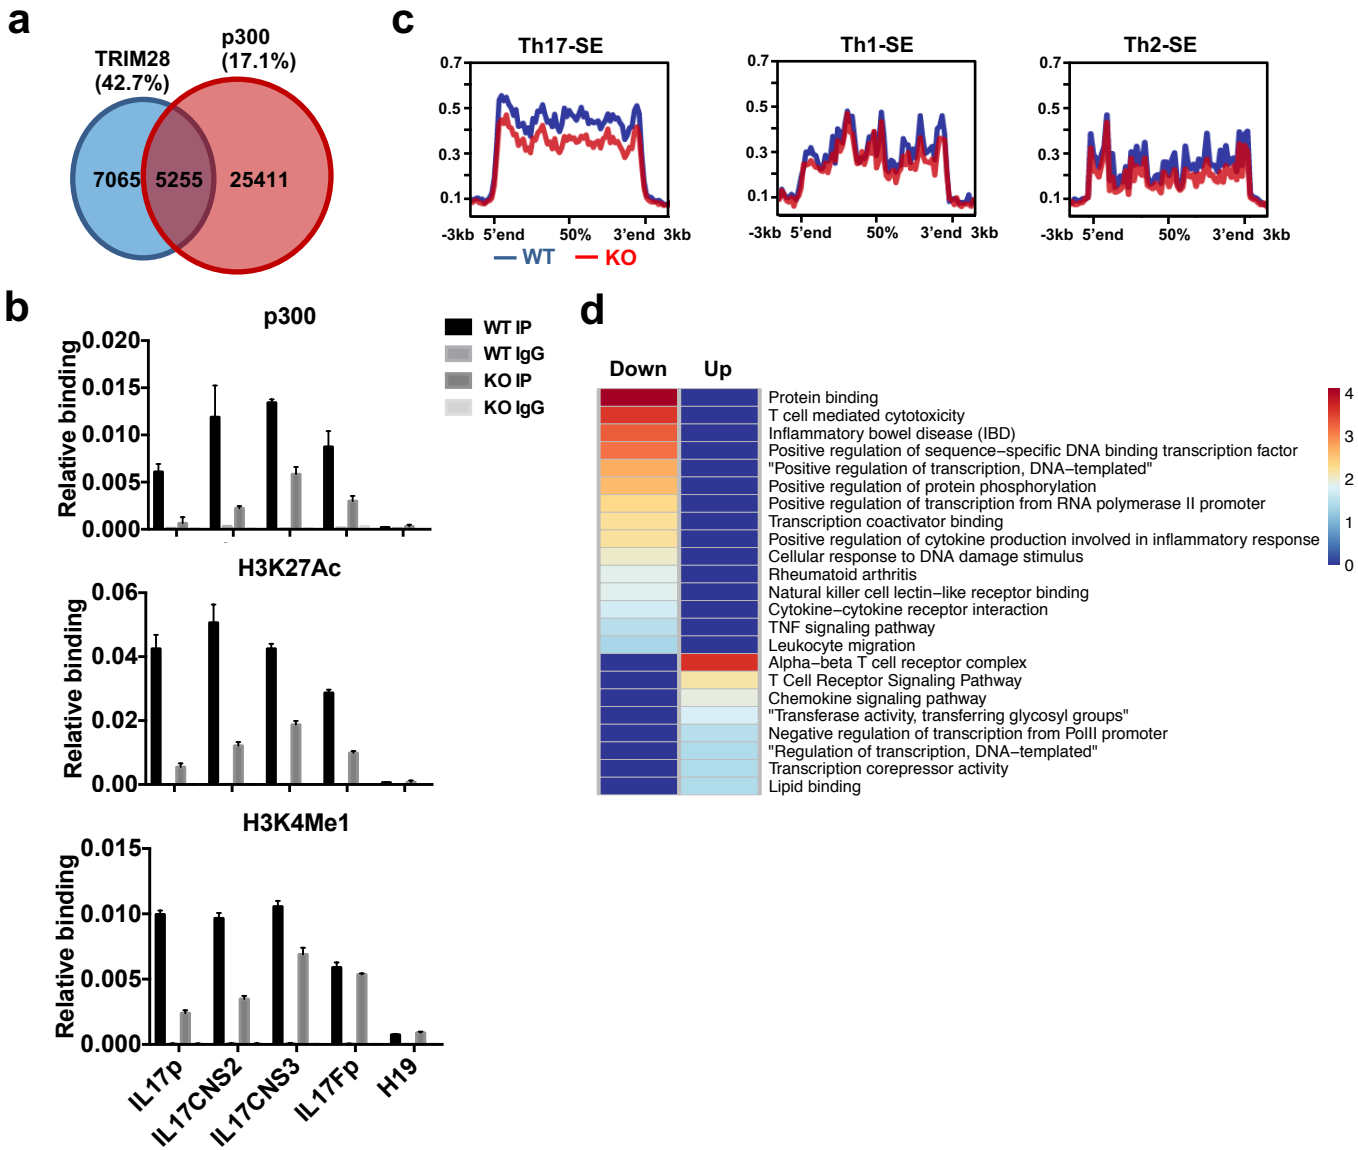

**Supplementary figure 5. TRIM28 regulates super-enhancer establishment in Th17 cells.**

(a) Overlap of TRIM28 and p300 binding peaks in Th17 cells; (b-e) WT or *Trim28*<sup>-/-</sup> naive CD4<sup>+</sup> T cells were cultured at Th17 condition (TGF- $\beta$  plus IL-6) for 3 days, and then prepared for ChIP-qPCR (b) or ChIP-seq experiments (c-d) performed with indicated antibodies. (c) Peak overlay of WT/TRIM28KO H3K27Ac marker over Th-specific SEs; (d) Heatmap of pathway analysis in genes associated with Th17-SEs that had decreased(left) or increased(right) H3K27Ac peaks. The qPCR were repeated 3 times with consistent results. All error bars represent SDs.

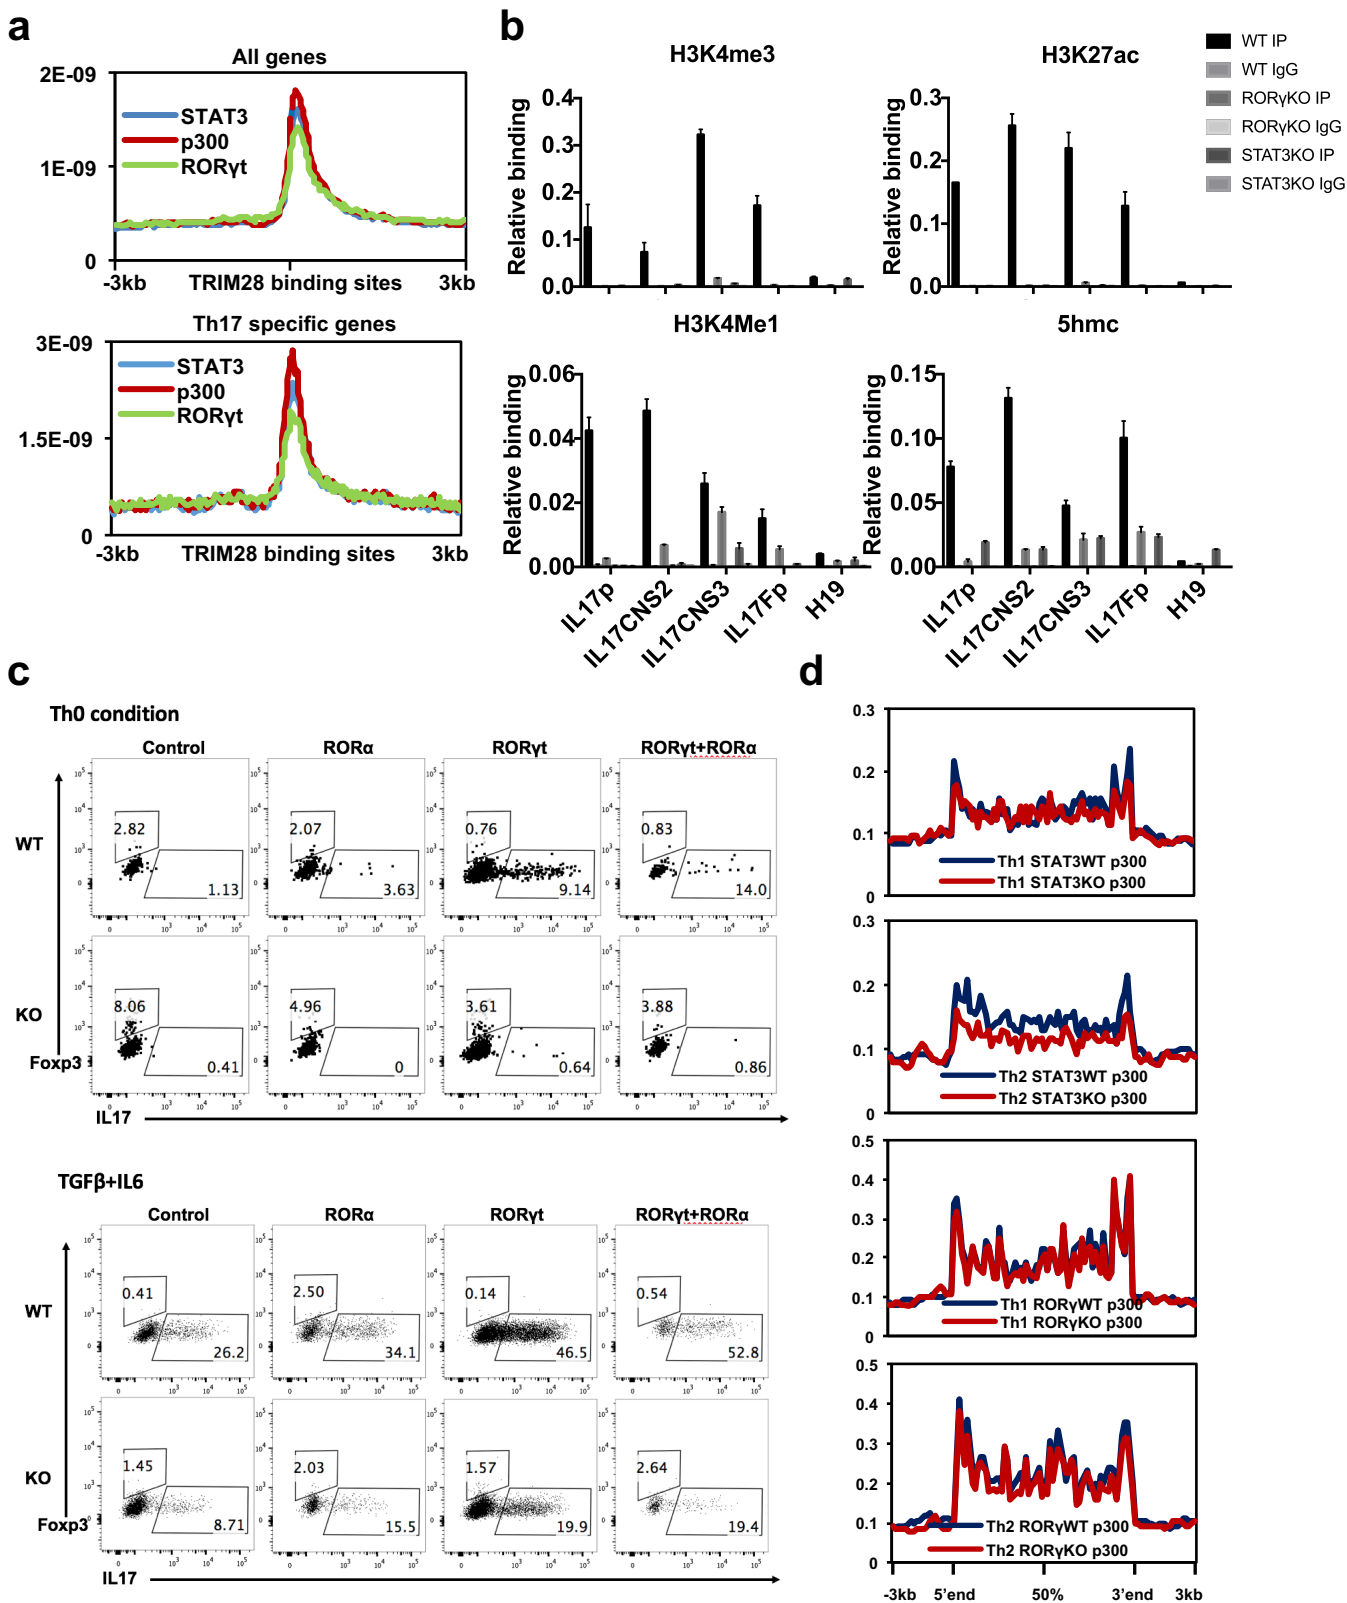

**Supplementary figure 6. TRIM28 bound to STAT3 and ROR $\gamma$  occupied regions in Th17 cells.**

(a) Overlay of TRIM28 binding peaks with that of STAT3, ROR $\gamma$ t and p300 in Th17 cells in all genes (up) vs Th17-specific genes (down); (b) Effect of STAT3- or ROR $\gamma$ -deficiency on changes of histone and DNA markers in Th17 cells, the error bars represent SDs; (c) Overexpression of ROR $\gamma$ t and ROR $\alpha$  alone or together in WT and TRIM28 KO CD4<sup>+</sup> T cells polarized under Th0 or Th17 (TGF- $\beta$  plus IL-6) conditions; (d) Overlay of p300 binding peaks in STAT3 WT/KO cells and ROR $\gamma$  WT/KO cells at Th1-SE and Th2-SE regions. (b-c), the experiments were repeated twice with consistent results.

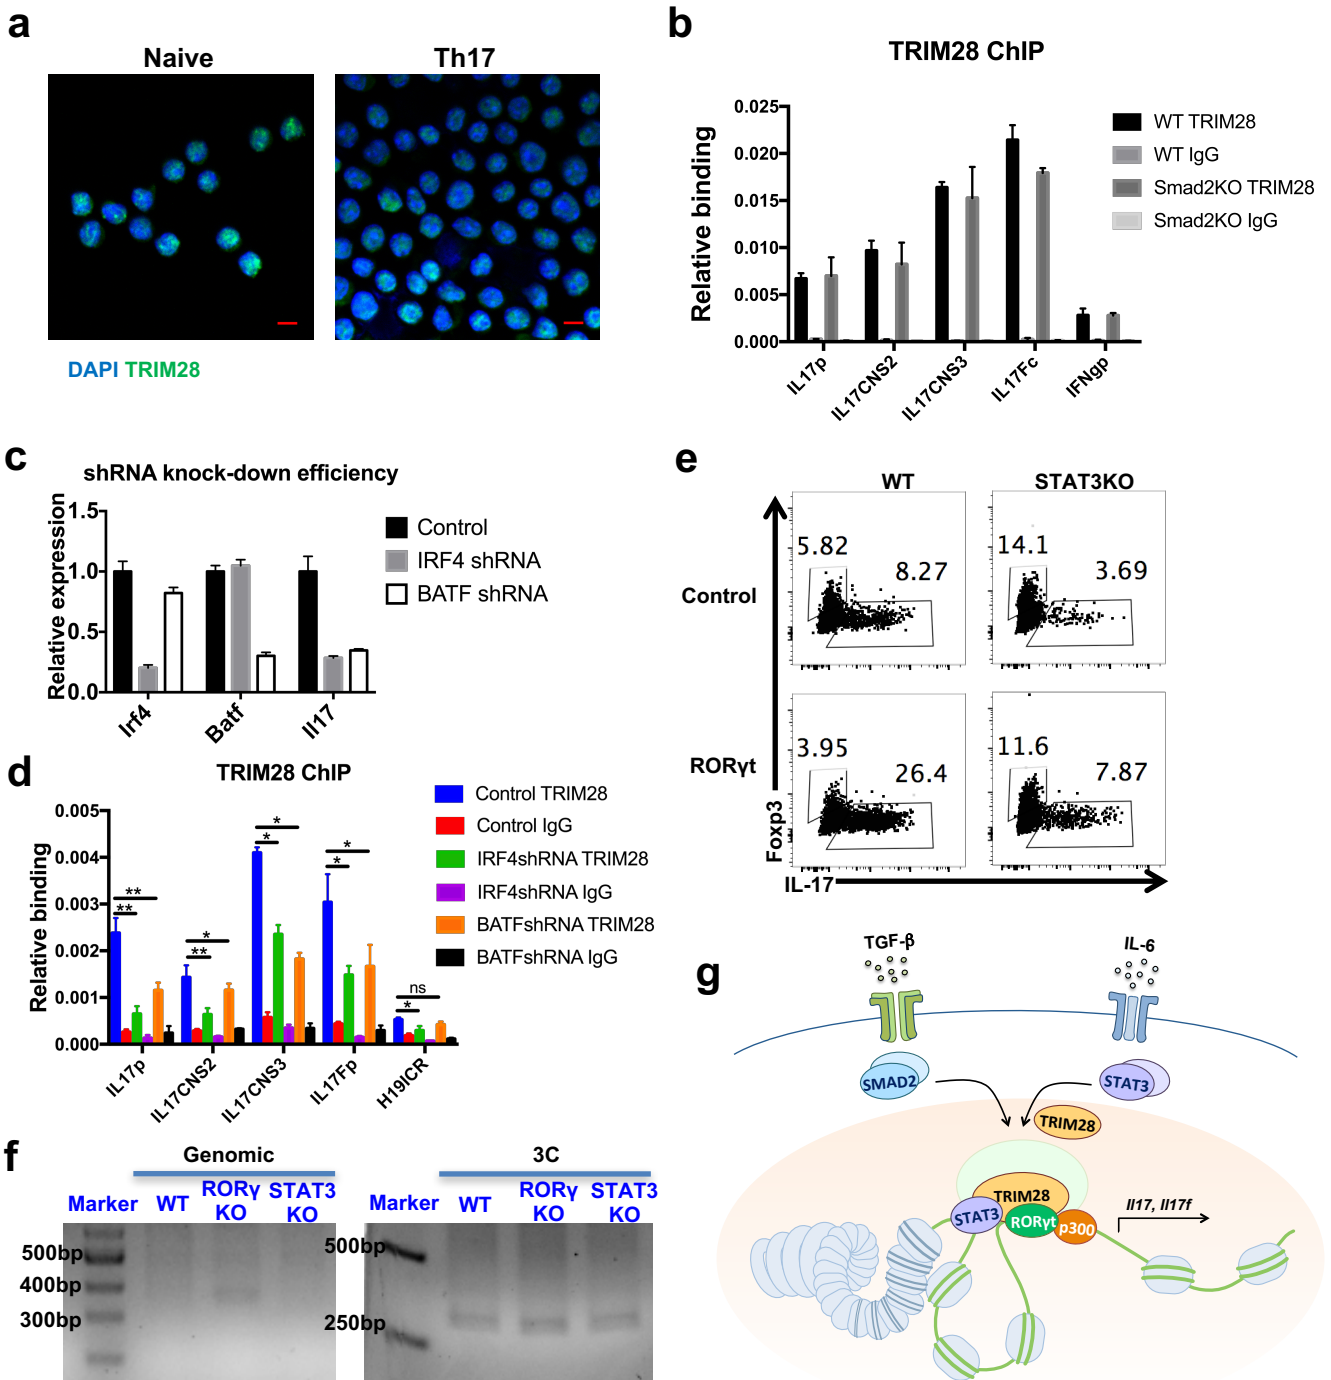

**Supplementary figure 7. Functional cooperation between TRIM28, STAT3 and RORγt in Th17 cells.**

(a) Naive CD4<sup>+</sup> T cells and Th17 cells cultured for 3 days (TGF-β plus IL-6) were fixed for immunofluorescence staining (scale bars: 0.5 μm); (b) TRIM28 ChIP-qPCR results in WT and Smad2 KO Th17 cells; (c) Knock-down efficiency of IRF4 and BATF shRNAs; (d) TRIM28 ChIP-qPCR results in control and Irf4/Batf gene knock-down Th17 cells; (e) RORγt overexpression in WT and STAT3KO CD4<sup>+</sup> T cells polarized under Th17 (TGF-β plus IL-6) condition; (f) 3C results of control actin locus in WT, STAT3KO and RORγtKO Th17 cells, and the whole DNA gels are shown in supplementary figure 8; (g) A schematic working model of TRIM28 in regulating Th17 development. (a-e) Those experiments were repeated 2-3 times with consistent results, and Student's t-test was used for the statistical test (ns, not significant; p < 0.05, \*; p < 0.01, \*\*; p < 0.005, \*\*\*). All error bars represent SDs.

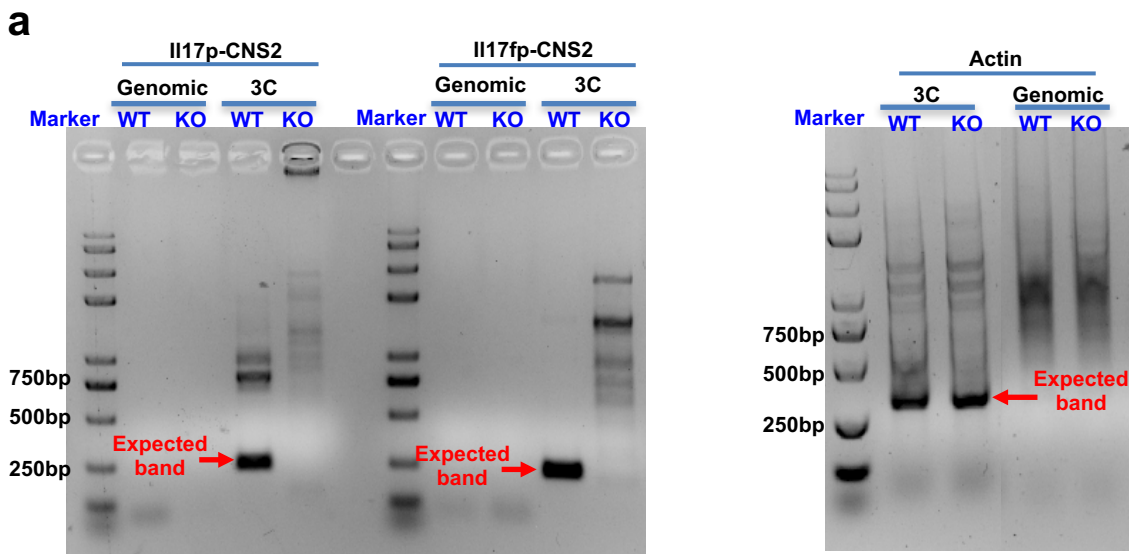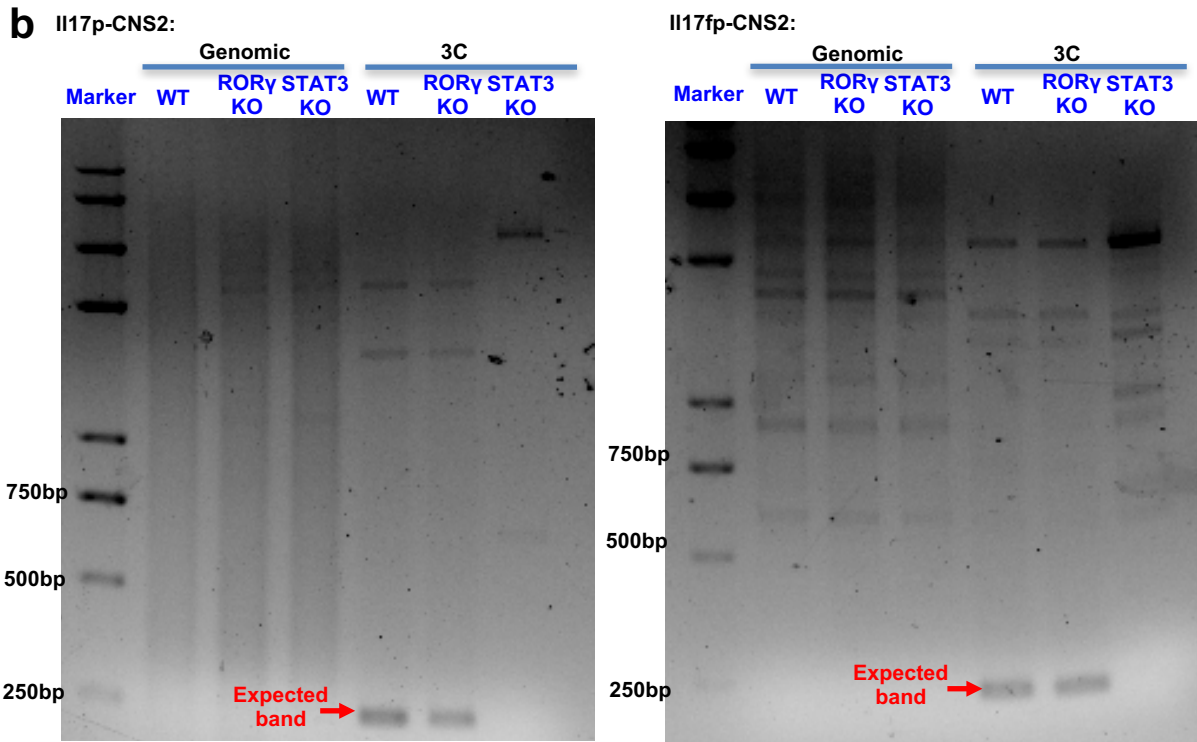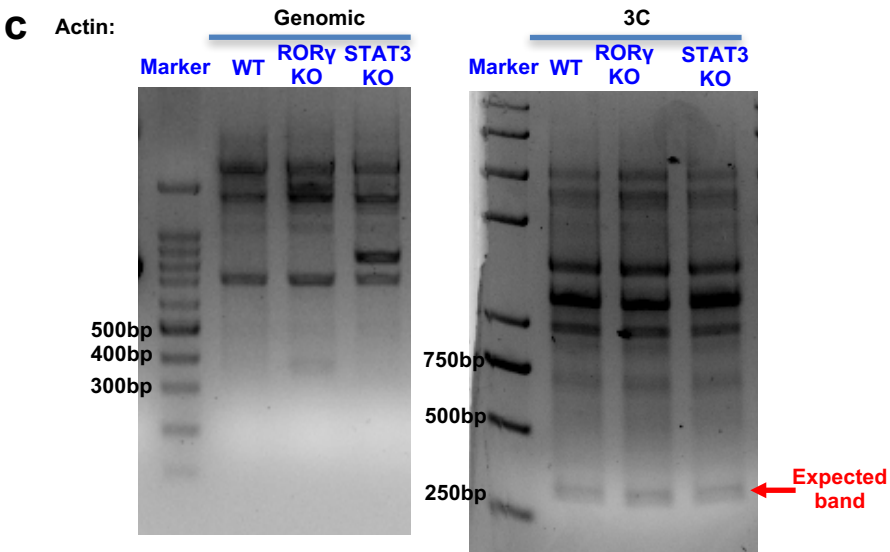

Supplemental figure 8. Whole DNA gels related to Figure 5h, 7e, supplementary figure 7e  
Whole DNA gels related to (a) Figure 5h; (b) Figure 7e; (c) supplementary figure 7e.

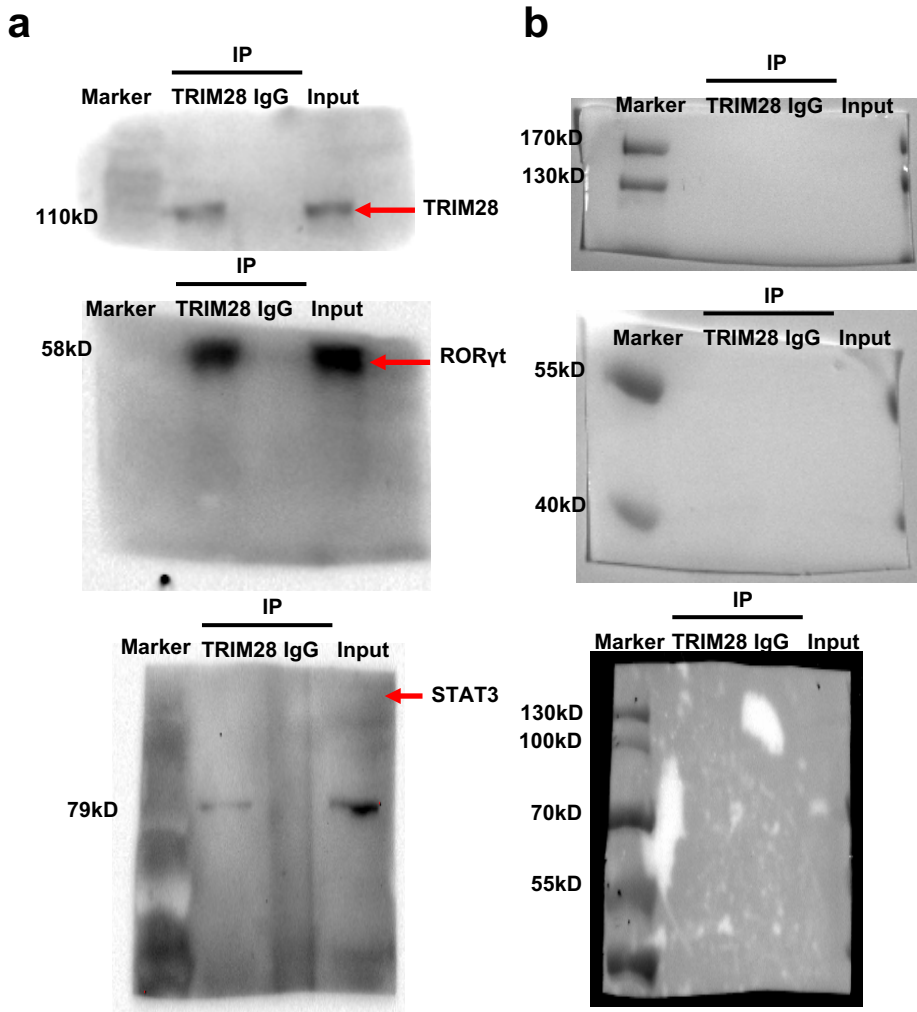

**Supplemental figure 9. Whole WB gels related to Figure 7f**

Whole WB gels related to Figure 7e, (a) up: anti-TRIM28; middle: anti-RORyt; down: STAT3; (b) the gel markers related to (a) were exposed in a different panel, up: anti-TRIM28; middle: anti-RORyt; down: STAT3.

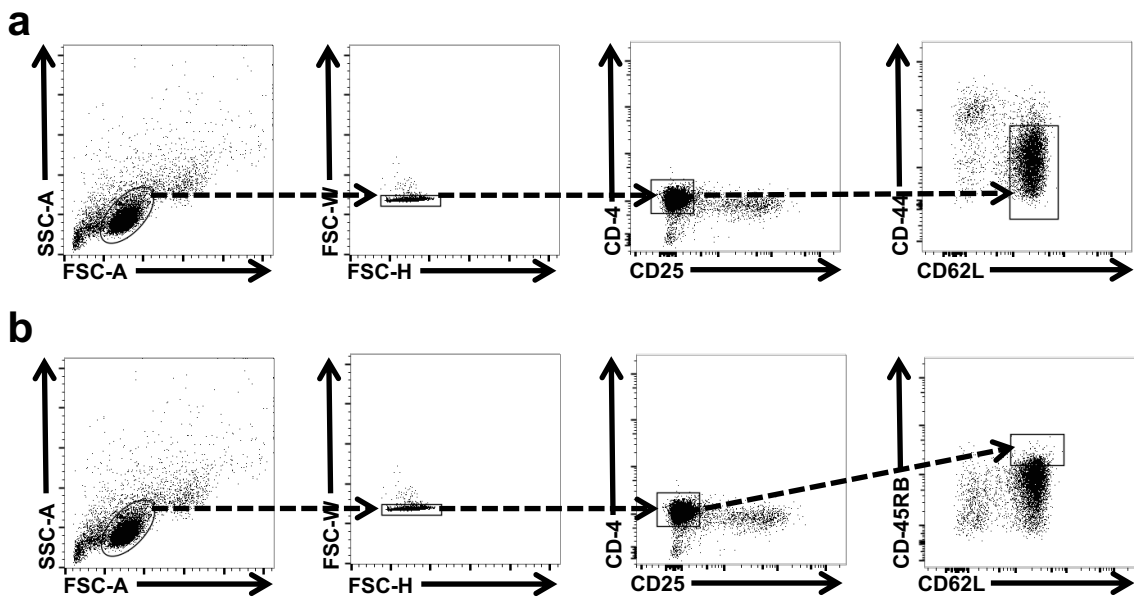

**Supplemental figure 10. Gating strategies for cell sorting**

(a) Gating strategy to sort CD4<sup>+</sup> naive T cells (CD4<sup>+</sup>CD25<sup>-</sup>CD44<sup>low</sup>CD62L<sup>hi</sup>) from the spleen and lymph nodes; (b) Gating strategy to sort CD4<sup>+</sup>CD25<sup>-</sup>CD62L<sup>hi</sup>CD45RB<sup>hi</sup> T cells for colitis induction.

## Supplemental table 1

### Genes that are bound by TRIM28 and upregulated in *Trim28*-deficient Th17 cells

| #GeneID   | WT-RPKM     | KO-RPKM     | log <sub>2</sub> Ratio(KO/WT) |
|-----------|-------------|-------------|-------------------------------|
| Clec12a   | 0.001       | 5.45720064  | 12.41394537                   |
| Pgpep1l   | 3.936503859 | 87.35726783 | 4.471940938                   |
| Usp18     | 0.676600438 | 10.09354991 | 3.898985739                   |
| Pltp      | 3.580343986 | 27.66262861 | 2.949768145                   |
| Hist1h2bg | 0.978045186 | 5.783627016 | 2.564001491                   |
| Acadm     | 30.7020574  | 160.0320824 | 2.381953916                   |
| Ramp3     | 1.354724751 | 6.753162882 | 2.317563596                   |
| Xcl1      | 2.695956228 | 11.59448589 | 2.104569872                   |
| Lgals7    | 13.85359231 | 59.5800773  | 2.104569872                   |
| Tbc1d30   | 3.211216976 | 12.22565779 | 1.928720037                   |
| Otud1     | 4.162202973 | 15.79068014 | 1.923654087                   |
| Sh3yl1    | 1.472560833 | 5.215440784 | 1.824461953                   |
| Fam188a   | 12.18207054 | 41.6497545  | 1.773548629                   |
| Ldhd      | 9.284865209 | 31.53999894 | 1.76422974                    |
| Slc1a4    | 1.76190132  | 5.930139496 | 1.750932918                   |
| Gstt2     | 34.24585956 | 107.8644519 | 1.655218008                   |
| Nars2     | 3.869050769 | 11.96507887 | 1.628778342                   |
| Cxcr3     | 6.45263487  | 19.80764731 | 1.618097235                   |
| Hilpda    | 2.289966204 | 6.89391259  | 1.589996699                   |
| Depdc1b   | 6.835202155 | 19.61871539 | 1.521174667                   |
| Shcbp1    | 12.46419217 | 35.52031261 | 1.510854898                   |
| Cd24a     | 79.92504876 | 223.4266254 | 1.483081496                   |
| Plac8     | 15.12386684 | 42.0457446  | 1.475132742                   |
| Hspb6     | 5.219069758 | 14.49613476 | 1.473803682                   |
| Hist1h2ao | 140.1349422 | 383.7509153 | 1.453353459                   |
| Tesc      | 49.64591629 | 127.5236174 | 1.361017503                   |
| Tg        | 3.980604611 | 10.22194344 | 1.360610032                   |
| Tnfsf10   | 1.429530548 | 3.597219473 | 1.331340734                   |
| Ccnb1     | 37.78839741 | 94.10312585 | 1.316299311                   |
| Sema4f    | 23.70052146 | 57.44422668 | 1.277243103                   |
| Mypop     | 3.573798567 | 8.497736012 | 1.249620205                   |
| Ube2e2    | 12.69117677 | 29.92775275 | 1.237658106                   |
| Pdss1     | 3.580343986 | 8.389918477 | 1.22855859                    |
| Hmgn5     | 23.37059701 | 54.65432608 | 1.225641106                   |
| Ccbl2     | 1.80770707  | 4.175139149 | 1.207663365                   |
| Ccnf      | 33.23862423 | 76.63954755 | 1.205228375                   |



|           |             |             |             |
|-----------|-------------|-------------|-------------|
| Hist1h2ag | 9.130896238 | 20.86176314 | 1.192032714 |
| Chst11    | 3.669658424 | 8.300206193 | 1.177501395 |
| Akr1b10   | 7.737387674 | 17.48203305 | 1.175954506 |
| Parp16    | 4.360435044 | 9.441565173 | 1.114553961 |
| Cenpn     | 8.76050231  | 18.92957212 | 1.111556303 |
| Pxmp2     | 6.683308774 | 14.37143683 | 1.104569872 |
| Hmgb2     | 275.220989  | 590.7397259 | 1.101932136 |
| Kif2c     | 22.02667962 | 46.85265518 | 1.088878775 |
| Fam173b   | 6.577269998 | 13.86609471 | 1.07600072  |
| Slc33a1   | 2.311971004 | 4.816180583 | 1.058766183 |
| Marcks    | 5.137015284 | 10.69875538 | 1.058440702 |
| Gadd45b   | 7.14422662  | 14.74311192 | 1.045191325 |
| Nsmce1    | 44.19507789 | 89.5060258  | 1.01809911  |
| Kcnmb4    | 16.1739958  | 32.58639746 | 1.010593724 |
| Tk1       | 10.06826754 | 20.13708346 | 1.000039289 |

Notes: FDR<0.01, log<sub>2</sub>Ratio(KO/WT)>1, KO-RPKM>2

## Supplemental table 2

**Genes that are bound by TRIM28 and downregulated in *Trim28*-deficient Th17 cells**

| #GeneID | WT-RPKM     | KO-RPKM     | log <sub>2</sub> Ratio(KO/WT) |
|---------|-------------|-------------|-------------------------------|
| Il10    | 2.993672001 | 0.001       | -11.54770045                  |
| Peli2   | 4.370602848 | 0.027642104 | -7.304821064                  |
| Rpph1   | 78.65740326 | 2.487364066 | -4.982892969                  |
| Trim28  | 207.1979713 | 8.94075563  | -4.534469301                  |
| Casr    | 2.016452252 | 0.106624751 | -4.241204965                  |
| Prss12  | 19.78459358 | 1.612445444 | -3.617055176                  |
| Il17f   | 401.2112803 | 47.35071238 | -3.082904133                  |
| Anxa3   | 7.616247491 | 0.998632886 | -2.931054037                  |
| Fhit    | 3.616219176 | 0.486008009 | -2.895430128                  |
| Entpd1  | 1.074870961 | 0.154089744 | -2.802320723                  |
| Gm20098 | 3.013882031 | 0.540074494 | -2.480392628                  |
| Ghitm   | 8.860532966 | 1.613448474 | -2.457245975                  |
| Il17a   | 285.852707  | 52.60424517 | -2.442020818                  |
| Rora    | 23.41376429 | 4.390790521 | -2.414804287                  |
| Furin   | 4.42071404  | 0.82989515  | -2.413278433                  |
| Atrnl1  | 7.933642768 | 1.495208994 | -2.407636286                  |
| Myo10   | 25.9042176  | 5.111106207 | -2.341479534                  |
| Gmfg    | 9.943376482 | 1.973696818 | -2.33283544                   |
| Nebl    | 8.376563178 | 1.736146731 | -2.270469559                  |

|           |             |             |              |
|-----------|-------------|-------------|--------------|
| Mctp2     | 6.703439222 | 1.419210306 | -2.239813073 |
| Dgkg      | 3.94933796  | 0.849244931 | -2.217358223 |
| Ar        | 2.507076482 | 0.539108584 | -2.217358223 |
| Gja1      | 65.47705407 | 14.57971852 | -2.167026547 |
| Cyp4f39   | 2.469862964 | 0.555809006 | -2.151769881 |
| Mast4     | 3.410234868 | 0.772712199 | -2.141868023 |
| Calcr1    | 10.13866785 | 2.309210076 | -2.134396774 |
| Maf       | 276.5948444 | 63.52613087 | -2.122352208 |
| Ahr       | 22.3344647  | 5.444221495 | -2.036474009 |
| Zfyve28   | 5.780726245 | 1.421797299 | -2.023534953 |
| Cd86      | 7.640135375 | 1.910342627 | -1.999766788 |
| Myo3b     | 4.542962046 | 1.162969932 | -1.965819456 |
| Abcc3     | 2.134463368 | 0.549487664 | -1.957714406 |
| Nrip1     | 18.26141446 | 4.747905134 | -1.943435501 |
| Megf9     | 1.964395133 | 0.528016539 | -1.895430128 |
| Hivep3    | 52.9919486  | 14.58889621 | -1.860902445 |
| Fscn1     | 11.55859082 | 3.212961833 | -1.846989773 |
| Gm16675   | 5.586313816 | 1.59349707  | -1.809700254 |
| Enpp1     | 2.7985319   | 0.802375505 | -1.802320723 |
| Spin4     | 4.429132431 | 1.277633123 | -1.793550514 |
| Zfp369    | 6.237211308 | 1.803317273 | -1.790247891 |
| Sh3bp5    | 30.77627412 | 9.231351158 | -1.737204854 |
| Trp53inp1 | 1.38466342  | 0.416851068 | -1.731931395 |
| Iglon5    | 14.93785901 | 4.534812555 | -1.719858563 |
| Syne1     | 4.894497461 | 1.516294939 | -1.690610336 |
| Maml2     | 10.95427786 | 3.481473987 | -1.653724231 |
| Gipr      | 3.608315423 | 1.172892096 | -1.621255164 |
| Tns4      | 2.087216305 | 0.680036443 | -1.617896152 |
| Prrg4     | 7.978405326 | 2.613218046 | -1.610272911 |
| Pdpn      | 21.76136718 | 7.128850094 | -1.610027909 |
| Hipk2     | 4.978351041 | 1.632350919 | -1.608716725 |
| Alpk2     | 23.41693119 | 7.69367437  | -1.605807347 |
| Foxn3     | 25.57114311 | 8.421408788 | -1.602383153 |
| Ptpn4     | 3.386380163 | 1.133502427 | -1.578956463 |
| Cbl       | 23.16411417 | 7.792892535 | -1.571660686 |
| Adora2a   | 23.32168817 | 7.847859396 | -1.571301125 |
| Mansc1    | 3.563968192 | 1.210069005 | -1.55839514  |
| Cdk6      | 26.90911164 | 9.425800672 | -1.513407686 |
| Tram2     | 5.300969729 | 1.861049373 | -1.510139972 |
| Fam20a    | 15.99238576 | 5.69029729  | -1.490809244 |
| Lnpep     | 25.74447691 | 9.174585467 | -1.488548077 |
| Lyst      | 4.725471793 | 1.725521913 | -1.453425581 |
| Satb1     | 6.501909198 | 2.398263286 | -1.438873359 |
| Dusp16    | 2.9121812   | 1.075327579 | -1.437323907 |

|          |             |             |              |
|----------|-------------|-------------|--------------|
| Tbkbp1   | 5.463276529 | 2.022186986 | -1.433850043 |
| Il3ra    | 21.57452617 | 8.002745937 | -1.430761861 |
| Ston2    | 4.786575478 | 1.780817948 | -1.426453821 |
| Zfp58    | 4.76874569  | 1.777439861 | -1.4238091   |
| Il21     | 173.1362046 | 64.89251077 | -1.415783547 |
| Alcam    | 8.788705402 | 3.312155806 | -1.407880129 |
| Sntb1    | 11.73381661 | 4.43058114  | -1.405104501 |
| Ptger2   | 18.59726446 | 7.208602867 | -1.36729885  |
| Paqr8    | 9.114629643 | 3.570191325 | -1.352182646 |
| Kctd12   | 8.662122547 | 3.406002145 | -1.34664124  |
| Mdn1     | 12.74402299 | 5.032483621 | -1.340478298 |
| Rgs1     | 112.6408742 | 44.78366576 | -1.330685906 |
| Heg1     | 8.263708184 | 3.298190904 | -1.325114403 |
| Nedd4    | 35.8282038  | 14.30211701 | -1.324867006 |
| Tex15    | 4.381748289 | 1.749852337 | -1.324273427 |
| Scaper   | 3.974529034 | 1.598648135 | -1.313931482 |
| Nxpe3    | 63.1198497  | 25.42101549 | -1.312072107 |
| Malt1    | 146.2607694 | 59.07986335 | -1.307804462 |
| Fnip1    | 14.91534481 | 6.100595994 | -1.289775232 |
| Myo1h    | 2.045689956 | 0.837894179 | -1.287747551 |
| Smox     | 6.727277911 | 2.7655561   | -1.282453251 |
| Obsl1    | 2.442577857 | 1.005777072 | -1.280093978 |
| Elk4     | 15.36105088 | 6.342066919 | -1.276251912 |
| Slc26a2  | 6.072589644 | 2.511188159 | -1.273941751 |
| Arhgef9  | 4.440426619 | 1.838723836 | -1.271993479 |
| Dmxl1    | 4.950497736 | 2.052263776 | -1.270357414 |
| Rasa1    | 45.51620208 | 18.95389948 | -1.263885491 |
| Ube2q2   | 84.20357777 | 35.21659253 | -1.25762621  |
| Nsg2     | 33.85603921 | 14.20004319 | -1.253517886 |
| Ly75     | 8.344444394 | 3.563682856 | -1.22744704  |
| Tnfsf8   | 17.27821299 | 7.401805996 | -1.223004786 |
| Ptch1    | 10.93314798 | 4.694502448 | -1.21966469  |
| Klf7     | 15.32834769 | 6.616314387 | -1.212102497 |
| Adam19   | 50.42299098 | 21.79169223 | -1.210303465 |
| Smo      | 23.44283565 | 10.16335581 | -1.205770248 |
| Mgat5    | 6.007226636 | 2.604359928 | -1.205770248 |
| Mib1     | 8.246212777 | 3.580545162 | -1.203552423 |
| H2-T24   | 4.755195633 | 2.0747033   | -1.196599662 |
| Zfp677   | 4.950599092 | 2.162368967 | -1.19499041  |
| Rapgef2  | 3.975363601 | 1.754154212 | -1.180311236 |
| BC016423 | 10.11374335 | 4.508272951 | -1.165670303 |
| C1galt1  | 10.75134005 | 4.810017844 | -1.160402338 |
| Eif5     | 5.080730195 | 2.282906001 | -1.154164396 |
| Arap1    | 3.890104773 | 1.772731628 | -1.133834867 |

|         |             |             |              |
|---------|-------------|-------------|--------------|
| Dusp6   | 30.88714663 | 14.07650062 | -1.133717871 |
| Ptgfrn  | 43.55817039 | 19.8675303  | -1.132530812 |
| Acvr2a  | 5.902746307 | 2.732116137 | -1.111367527 |
| Lysmd3  | 5.892340564 | 2.729840461 | -1.110024179 |
| Zfyve16 | 3.641428556 | 1.690640959 | -1.106934233 |
| Lamc1   | 29.00163182 | 13.53332299 | -1.099617954 |
| Farp1   | 11.7958955  | 5.525768638 | -1.094037884 |
| Tmtc2   | 2.29478634  | 1.077668697 | -1.09044611  |
| Prkacb  | 2.840521697 | 1.340804403 | -1.083057131 |
| Pdgfb   | 28.4877167  | 13.45499033 | -1.082198639 |
| Rel     | 11.231528   | 5.318377115 | -1.078496229 |
| Slco3a1 | 9.572484517 | 4.543662697 | -1.075037683 |
| Baz2b   | 6.161960439 | 2.937770216 | -1.068667863 |
| Raph1   | 19.34728823 | 9.239287496 | -1.066277863 |
| Arap2   | 14.52074319 | 6.938809985 | -1.065355129 |
| Myb     | 3.662814181 | 1.755050367 | -1.061440079 |
| Egr3    | 37.16882528 | 17.81205624 | -1.061239021 |
| Zfp507  | 10.59038185 | 5.09015192  | -1.056973988 |
| Rasgrp1 | 22.92809227 | 11.0713033  | -1.050291257 |
| Smad3   | 38.96736663 | 18.86780483 | -1.046339856 |
| Ammecr1 | 7.06164983  | 3.432226389 | -1.040860567 |
| Dopey1  | 4.647697739 | 2.26817942  | -1.03498148  |
| Med13l  | 21.05080831 | 10.2752302  | -1.034704916 |
| Hspa4l  | 25.0624079  | 12.25249386 | -1.032449607 |
| Cxcr4   | 41.45413103 | 20.3319133  | -1.027769894 |
| Tab3    | 3.770555021 | 1.849638379 | -1.027533664 |
| Stat1   | 6.353849891 | 3.119403131 | -1.026360998 |
| Bmp2k   | 9.887947719 | 4.861408585 | -1.024296722 |
| Pde3b   | 53.39792666 | 26.28723484 | -1.022421333 |
| Bend4   | 2.937371058 | 1.446652195 | -1.021807413 |
| Stat4   | 26.2814784  | 12.96249606 | -1.019702882 |
| Chm     | 36.08739564 | 17.97167812 | -1.005769903 |
| Ubtd2   | 6.052374683 | 3.015603359 | -1.005054619 |
| Mxi1    | 5.278854729 | 2.634020132 | -1.002958592 |
| Zbtb26  | 2.814190982 | 1.405901429 | -1.001224792 |

---

Notes: FDR<0.01, log<sub>2</sub>Ratio(KO/WT)<-1, WT-RPKM>2

## Supplemental table 3

### Primers used in ChIP- and MeDIP-qPCR

| Name              | Forward                 | Reverse                  |
|-------------------|-------------------------|--------------------------|
| <i>IL17p</i>      | CAGCTCCCAAGAAG TCATGC   | TGAGGTCAGCACAGAACCAC     |
| <i>IL17CNS2</i>   | TGTGGTTGTCTAAGCCATGC    | CAGCAACTGACTGGGTTTCA     |
| <i>IL17CNS2-0</i> | ATGGGCCTCTCTTTCCACTGATG | GGAATTTGTGGTGGGAAGGGAGTG |
| <i>IL17CNS3</i>   | GCACTTTGCTCATGCCCATAT   | TGAACCAACTTTCCCACTCT     |
| <i>IL17fp</i>     | TCCCTGTTTCCACTGACCTC    | TTAGGGTCCCCCTTTGATTC     |
| <i>Ifngp</i>      | GGGGGAGACGTAAAAGCAAT    | GGGCTCTCTGACGATGAGAC     |
| <i>H19</i>        | GCATGGTCCTCAAATTCTGCA   | GCATCTGAACGCCCAATTA      |

## Supplemental table 4

### Primers used in 3C assay

| Name                  | Sequence                  |
|-----------------------|---------------------------|
| <i>CNS2-5'end-1</i>   | TTTTCCCTAGCAGTGGTTTTGGA   |
| <i>CNS2-5'end-2</i>   | GAGGTTGATGGCAGAGCTCA      |
| <i>IL17p-3'end-1</i>  | TGATACCGAACCTCAAAACAGCA   |
| <i>IL17p-3'end-2</i>  | CTCTCTAGCCAGGGAATTTGGT    |
| <i>IL17fp-3'end-1</i> | CCTGCAAGACTGGAAAGGAGAAA   |
| <i>IL17fp-3'end-2</i> | AAGACAAGCTCAGAAAAGGCC     |
| <i>Actin-1</i>        | AGCAGTGGTTTCTATTGGCTGTCTG |
| <i>Actin-2</i>        | CAAGCAGGATTCCTGTTTCCTT    |
